# Supplementary material for: Development of a mechanistic model to predict synthetic biotic activity in healthy volunteers and patients with phenylketonuria
Source: PubMed Central journal article supplement (PMC8298439; doi:10.1038/s42003-021-02183-1), 2021-07-22
Supplement: 42003_2021_2183_MOESM2_ESM.pdf [file 42003_2021_2183_MOESM2_ESM.pdf]

## **Description of Additional Supplementary Files**

**File name:** Supplementary Data

**Description:** Source data underlying all graphs and charts.
